# Supplementary material for: An ontological foundation for ocular phenotypes and rare eye diseases
Source: Springer Nature journal article supplement (doi:10.1186/s13023-018-0980-6), 2019-01-09
Supplement: MOESM1 [file 16388106]

## **An ontological foundation for ocular phenotypes and rare eye diseases**

Panagiotis I. Sergouniotis<sup>1</sup>, Emmanuel Maxime<sup>2</sup>, Dorothée Leroux<sup>3</sup>, Annie Olry<sup>2</sup>, Rachel Thompson<sup>4</sup>, Ana Rath<sup>2</sup>, Peter N. Robinson<sup>5</sup>, and H  l  ne Dollfus<sup>3</sup> on behalf of the ERN-EYE Ontology Study Group†

<sup>1</sup> University of Manchester & Manchester Royal Eye Hospital, Manchester, UK.

<sup>2</sup> Orphanet, INSERM (Institut National de la Sant   et de la Recherche M  dicale), Paris, France.

<sup>3</sup> Centre for Rare Eye Diseases CARGO, SENSGENE FSMR Network, Strasbourg University Hospital, Strasbourg, France.

<sup>4</sup> Newcastle University, Newcastle upon Tyne, UK.

<sup>5</sup> The Jackson Laboratory for Genomic Medicine, Farmington, US.

† ERN-EYE Ontology Study Group:

Jane L. Ashworth<sup>1</sup>, Isabelle Audo<sup>6</sup>, Vilma Jurate Balciuniene<sup>7</sup>, Eyal Banin<sup>8</sup>, Graeme C. Black<sup>1</sup>, Daniel B  hringer<sup>9</sup>, Camiel J.F. Boon<sup>10,11</sup>, Dominique Bremond-Gignac<sup>12</sup>, Patrick Calvas<sup>13</sup>, Guilherme Castela<sup>14</sup>, Gislin Dagnelie<sup>15</sup>, Susan M. Downes<sup>16</sup>, Adriano Fasolo<sup>17</sup>, Christina Fasser<sup>18</sup>, Arvydas Gelzinis<sup>7</sup>, Kerry Goetz<sup>19</sup>, Steffen Hamann<sup>20</sup>, Elise H  on<sup>21</sup>, Giancarlo Iarossi<sup>22</sup>, Aki Kawasaki<sup>23</sup>, David Keegan<sup>24</sup>, Line Kessel<sup>20</sup>, Kamron Khan<sup>25</sup>, Artur Klett<sup>26</sup>, Sebastian K  hler<sup>27</sup>, Bart P. Leroy<sup>28</sup>, Walter Lisch<sup>29</sup>, Petra Liskova<sup>30</sup>, Birgit Lorenz<sup>31</sup>, Riccardo Maggi<sup>22</sup>, Isabelle Meunier<sup>32</sup>, Saddek Mohand-Said<sup>6</sup>, Katarzyna Nowomiejska<sup>33</sup>, Yaumara Perdomo<sup>3</sup>, Axel Petzold<sup>34</sup>, Markus Preising<sup>31</sup>, Hendrik P.N. Scholl<sup>35,36,37</sup>, Andrea Sodi<sup>38</sup>, Katarina Stingl<sup>39</sup>, Fouzia Studer<sup>3</sup>, Agnese Suppiej<sup>40</sup>, Valerie Touitou<sup>41</sup>, Elias Traboulsi<sup>42</sup>, Jurgis Trumpaitis<sup>7</sup>, Stephen J. Tuft<sup>34</sup>, Veronika Vaclavik<sup>43</sup>, Sandra Valeina<sup>44</sup>, Caroline Van Cauwenbergh<sup>28</sup>, Alain Verloes<sup>45</sup>, Alain Vighetto<sup>46</sup>, Russell Wheeler<sup>47</sup>, Thomas Wheeler-Schilling<sup>39</sup>, Patrick Yu-Wai-Man<sup>34,48</sup>, Ditta Zobor<sup>39</sup>, Eberhart Zrenner<sup>39</sup>.

- <sup>6</sup> Quinze-Vingts National Ophthalmology Hospital, Paris, France.
- <sup>7</sup> Hospital of Lithuanian University of Health Science, Kaunas, Lithuania.
- <sup>8</sup> Hadassah Medical Center, Jerusalem, Israel.
- <sup>9</sup> Eye Centre, University Hospital Freiburg, Germany.
- <sup>10</sup> Academic Medical Centre, University of Amsterdam, Amsterdam, the Netherlands.
- <sup>11</sup> Leiden University Medical Center, Leiden, the Netherlands.
- <sup>12</sup> University Hospital Necker-Enfants Malades, Paris, France.
- <sup>13</sup> University of Toulouse, Toulouse, France.
- <sup>14</sup> University of Coimbra, Coimbra, Portugal.
- <sup>15</sup> Johns Hopkins University School of Medicine, Baltimore, USA.
- <sup>16</sup> Nuffield Department of Clinical Neuroscience, John Radcliffe Hospital, Oxford, UK.
- <sup>17</sup> The Veneto Eye Bank Foundation, Venice, Italy.
- <sup>18</sup> Retina International, Zürich, Switzerland.
- <sup>19</sup> National Eye Institute, Bethesda, USA.
- <sup>20</sup> Department of Ophthalmology, Rigshospitalet, University of Copenhagen, Glostrup, Denmark.
- <sup>21</sup> The Hospital for Sick Children, Toronto, Canada.
- <sup>22</sup> Bambino Gesù Children's Hospital, Rome, Italy.
- <sup>23</sup> University of Lausanne, Lausanne, Switzerland.
- <sup>24</sup> Mater Misericordiae University Hospital, Dublin, Ireland.
- <sup>25</sup> St James's University Hospital, Leeds, UK.
- <sup>26</sup> Eye Clinic of East Tallinn Central Hospital, Tallinn, Estonia
- <sup>27</sup> Charité-Universitätsmedizin Berlin, Berlin, Germany.
- <sup>28</sup> Ghent University & Ghent University Hospital, Ghent, Belgium.
- <sup>29</sup> Johannes Gutenberg University Mainz, Mainz, Germany.
- <sup>30</sup> Charles University & General University Hospital in Prague, Prague, Czech Republic.
- <sup>31</sup> Justus Liebig University, Giessen, Germany.

- <sup>32</sup> University of Montpellier, Montpellier, France.
- <sup>33</sup> Medical University of Lublin, Lublin, Poland.
- <sup>34</sup> Moorfields Eye Hospital, London, UK.
- <sup>35</sup> Institute of Molecular & Clinical Ophthalmology Basel, Basel, Switzerland.
- <sup>36</sup> Department of Ophthalmology, University of Basel, Basel, Switzerland.
- <sup>37</sup> Wilmer Eye Institute, Johns Hopkins University, Baltimore, United States.
- <sup>38</sup> Careggi Teaching Hospital, Florence, Italy.
- <sup>39</sup> University of Tübingen, Tübingen, Germany.
- <sup>40</sup> Pediatric University Hospital of Padova, Italy.
- <sup>41</sup> Pitie-Salpetriere Hospital, Paris, France.
- <sup>42</sup> Cleveland Clinic, Cleveland, USA.
- <sup>43</sup> Jules-Gonin Eye Hospital, Lausanne, Switzerland.
- <sup>44</sup> Children's Clinical University Hospital, Riga, Latvia.
- <sup>45</sup> APHP - University Hospital Robert Debré, Paris, France.
- <sup>46</sup> Hospital for Neurology & Neurosurgery Pierre Wertheimer, Bron, France.
- <sup>47</sup> Leber's Hereditary Optic Neuropathy (LHON) Society, UK.
- <sup>48</sup> University of Cambridge, Cambridge, UK.

Figure S1

**Figure S1:** Example of hierarchical (tree) structure of data in the Orphanet Rare Disease Ontology (ORDO). PHACE syndrome (posterior fossa anomalies, hemangioma, arterial lesions, cardiac abnormalities/coarctation of the aorta, eye anomalies) is used as an example; only the ocular component of the disorder is shown.

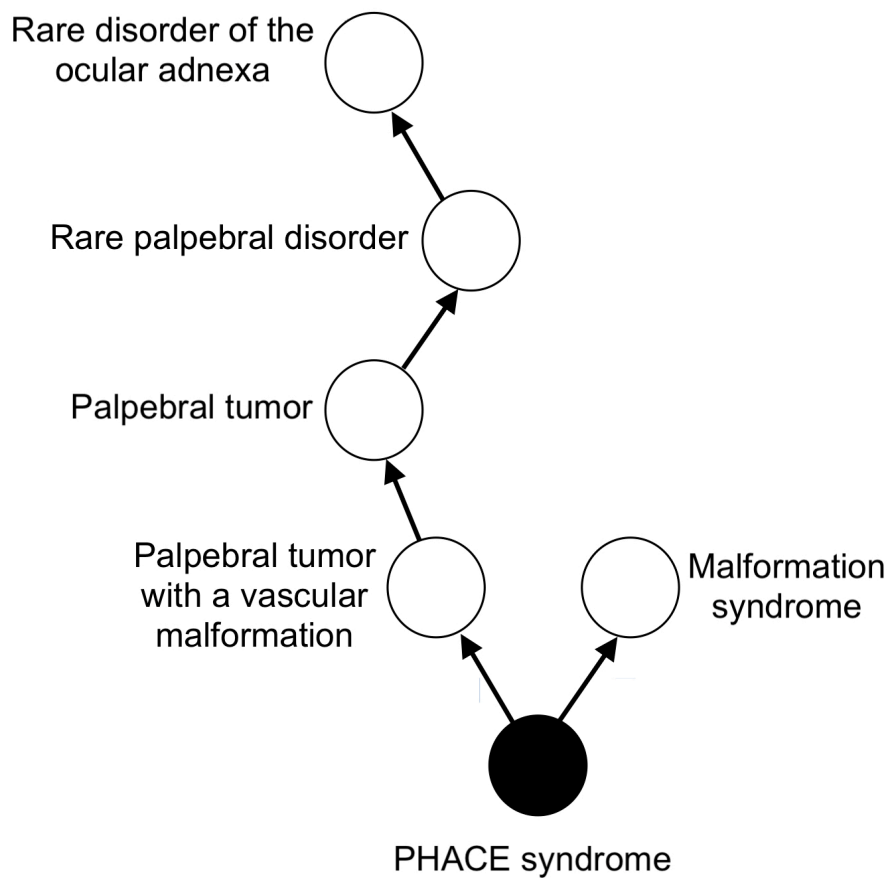

Table S1

|                                                        | total terms at time of publication | terms reviewed during the ERN-EYE Ontology meeting, 10/2017                                                  |
|--------------------------------------------------------|------------------------------------|--------------------------------------------------------------------------------------------------------------|
| Human Phenotype Ontology (HPO), 11/2018 version        | 1106                               | 605 added,<br>>400 revised                                                                                   |
| Orphanet Rare Disease Ontology (ORDO), 11/2018 version | 1202                               | 67 groups created,<br>36 disorders introduced,<br>90 terms removed/merged,<br>131 nomenclature modifications |

A detailed list of the modifications that were made in HPO as a result of the ERN-EYE Ontology meeting can be found in the HPO GitHub repository (label "ERN-EYE": <https://github.com/obophenotype/human-phenotype-ontology/labels/ERN-EYE>). For a list of the groups and disorders introduced to ORDO please see Table S2 and <https://www.orpha.net>.

Table S2

A list of disease groups and specific disorders introduced to the Orphanet Rare Disease Ontology (ORDO) as a result of the ERN-EYE Ontology meeting (Mont Sainte-Odile, France, 10/2017)

| ORDO disease groups                                                | ORPHA code          |
|--------------------------------------------------------------------|---------------------|
| Rare disorder of the visual organs                                 | ORPHA:520814        |
| Rare disorder of the orbital region                                | currently evaluated |
| Rare disorder of the ocular adnexa                                 | ORPHA:519266        |
| Rare eyelid disorder                                               | currently evaluated |
| Rare nasolacrimal system disorder                                  | currently evaluated |
| Syndromic nasolacrimal system disorder                             | ORPHA:519274        |
| Isolated nasolacrimal system disorder                              | currently evaluated |
| Aplasia/hypoplasia of the nasolacrimal drainage system             | currently evaluated |
| Inflammatory/autoimmune disorder involving the nasolacrimal system | ORPHA:519264        |
| Rare disorder with entropion                                       | ORPHA:519270        |
| Rare disorder with ectropion                                       | ORPHA:519268        |
| Structural developmental eye defect                                | ORPHA:519272        |
| Coloboma with extraocular manifestations                           | currently evaluated |
| Rare disorder of the anterior segment of the eye                   | ORPHA:519284        |
| Anterior segment dysgenesis with extraocular manifestations        | ORPHA:519276        |
| Rare disorder with conjunctival involvement as a major feature     | ORPHA:519280        |
| Rare disorder with corneal involvement as a major feature          | ORPHA:519288        |
| Rare corneal disorder                                              | ORPHA:519282        |
| Rare inflammatory/autoimmune corneal disorder                      | ORPHA:519290        |
| Non-infective crystalline keratopathy                              | currently evaluated |
| Infective keratitis                                                | ORPHA:519278        |
| Rare disorder of the pupil                                         | ORPHA:519286        |
| Early-onset cataract                                               | currently evaluated |

| ORDO disease groups (continued)                                                   | ORPHA code          |
|-----------------------------------------------------------------------------------|---------------------|
| Syndromic ectopia lentis                                                          | ORPHA:519292        |
| Syndromic microspherophakia                                                       | ORPHA:519294        |
| Syndromic microphakia                                                             | ORPHA:519294        |
| Rare scleral disorder                                                             | ORPHA:519298        |
| Rare disorder with pigmented sclera                                               | ORPHA:519296        |
| Rare disorder of the posterior segment of the eye                                 | ORPHA:519311        |
| Rare choroidal disorder                                                           | ORPHA:519309        |
| Isolated chorioretinal dystrophy                                                  | ORPHA:519300        |
| Syndromic chorioretinal dystrophy                                                 | ORPHA:519321        |
| Rare retinal disorder                                                             | ORPHA:519315        |
| Inflammatory/autoimmune retinopathy                                               | currently evaluated |
| Retinal tumor                                                                     | currently evaluated |
| Rare retinal vasculopathy                                                         | ORPHA:519317        |
| Isolated vitreoretinopathy                                                        | ORPHA:519304        |
| Syndromic vitreoretinopathy                                                       | ORPHA:519327        |
| Isolated inherited retinal disorder                                               | currently evaluated |
| Isolated stationary inherited retinal disorder                                    | ORPHA:519319        |
| Isolated progressive inherited retinal disorder                                   | ORPHA:519306        |
| Syndromic inherited retinal disorder                                              | ORPHA:519325        |
| Syndromic stationary inherited retinal disorder                                   | currently evaluated |
| Syndromic progressive inherited retinal disorder                                  | currently evaluated |
| Inherited disorder of cone function                                               | currently evaluated |
| Rare macular disorder                                                             | ORPHA:519313        |
| Isolated macular dystrophy                                                        | ORPHA:519302        |
| Syndromic macular dystrophy                                                       | ORPHA:519323        |
| Rare disorder affecting multiple structures of the eye                            | ORPHA:519329        |
| Primary early-onset glaucoma                                                      | currently evaluated |
| Secondary early-onset glaucoma                                                    | ORPHA:519331        |
| Rare optic nerve disorder                                                         | ORPHA:519351        |
| Rare disorder with optic disc malformation                                        | ORPHA:519345        |
| Rare ophthalmic disorder with cranial nerve involvement                           | ORPHA:519349        |
| Rare oculomotor nerve disorder                                                    | currently evaluated |
| Rare trochlear nerve disorder                                                     | ORPHA:519353        |
| Rare trigeminal nerve disorder                                                    | currently evaluated |
| Rare abducens nerve disorder                                                      | currently evaluated |
| Rare facial nerve disorder                                                        | currently evaluated |
| Rare disorder with extraocular muscle involvement                                 | ORPHA:519355        |
| Rare ocular motility/alignment disorder                                           | ORPHA:519347        |
| Inflammatory/autoimmune optic neuropathy                                          | ORPHA:499047        |
| Pseudopapilledema                                                                 | ORPHA:519339        |
| Disorder with optic nerve compression                                             | ORPHA:519337        |
| Congenital optic disc excavation                                                  | ORPHA:519333        |
| Rare brainstem/cerebellar disorder with ophthalmic involvement as a major feature | ORPHA:519341        |
| Rare cortical disorder with ophthalmic involvement as a major feature             | ORPHA:519343        |

| ORDO disorders                                              | ORPHA code          |
|-------------------------------------------------------------|---------------------|
| Congenital cystic eye                                       | ORPHA:519384        |
| Isolated coloboma                                           | currently evaluated |
| Isolated blepharochalasis                                   | ORPHA:519390        |
| Isolated congenital entropion                               | ORPHA:519386        |
| Complete absence of nasolacrimal drainage system            | currently evaluated |
| Agenesis lacrimal ducts                                     | currently evaluated |
| Congenital lacrimal punctal membrane                        | currently evaluated |
| Autosomal recessive anterior segment dysgenesis             | currently evaluated |
| Posterior polymorphous corneal dystrophy type 1             | currently evaluated |
| Posterior polymorphous corneal dystrophy type 2             | currently evaluated |
| Posterior polymorphous corneal dystrophy type 3             | currently evaluated |
| Early-onset Fuchs endothelial corneal dystrophy             | currently evaluated |
| Thygeson superficial punctate keratopathy                   | ORPHA:519406        |
| Fungal keratitis                                            | ORPHA:519930        |
| Mooren ulcer                                                | ORPHA:519408        |
| Terrien marginal degeneration                               | ORPHA:519410        |
| Infective crystalline keratopathy                           | currently evaluated |
| Paraproteinemic keratopathy                                 | currently evaluated |
| Isolated iridoschisis                                       | ORPHA:519392        |
| Isolated microphakia                                        | ORPHA:519394        |
| Isolated microspherophakia                                  | ORPHA:519396        |
| Early childhood onset retinal dystrophy                     | currently evaluated |
| Isolated foveal hypoplasia                                  | ORPHA:519398        |
| Isolated megalopapilla                                      | ORPHA:519402        |
| Isolated morning glory anomaly                              | currently evaluated |
| Peripapillary staphyloma                                    | ORPHA:519400        |
| Optic disc pit                                              | ORPHA:519404        |
| Isolated optic neuritis                                     | ORPHA:499096        |
| Chronic relapsing inflammatory optic neuropathy             | ORPHA:499085        |
| MOG-positive optic neuritis                                 | currently evaluated |
| GQ1b-positive optic neuritis                                | currently evaluated |
| AQP4-positive optic neuritis                                | currently evaluated |
| Optic perineuritis                                          | ORPHA:499107        |
| Osteopetrosis with optic nerve compression                  | currently evaluated |
| Ischemic optic neuropathy associated with optic disc drusen | currently evaluated |
| Ocular myasthenia                                           | currently evaluated |

“Currently evaluated” is used for terms that are under consideration as of 19 Nov 2018.
